# Supplementary material for: Engineering magic number Au19 and Au20 cage structures using electron withdrawing atoms
Source: Royal Society of Chemistry journal article supplement (doi:10.1039/d3cp00651d), 2023-01-01
Supplement: d3cp00651d1.pdf [file d3cp00651d1.pdf]

## SUPPLEMENTARY INFORMATION

Figure S1: Optimized Structures of Isomers 1-6 for Au<sub>18</sub>, Au<sub>19</sub>, and Au<sub>20</sub> Neutral Cage Clusters.

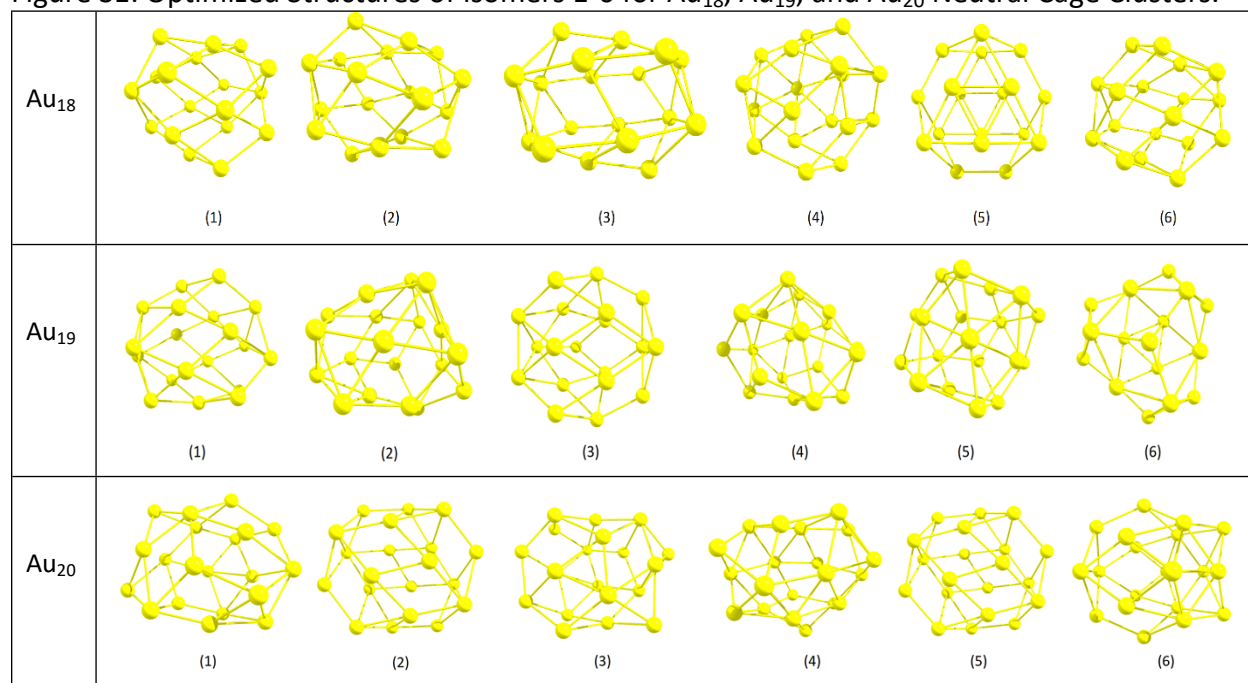

Table S1: Structural Energy (au) Parameters for neutral Au<sub>18</sub>, Au<sub>19</sub>, and Au<sub>20</sub> Cage and Compact Structures.

|                | Au <sub>18</sub> <sup>0</sup> Cage Energy (au) | Au <sub>18</sub> <sup>0</sup> Compact Energy (au) |
|----------------|------------------------------------------------|---------------------------------------------------|
| 18:1           | -598.1152                                      | -598.1112                                         |
| 18:2           | -598.1035                                      |                                                   |
| 18:3           | -598.0932                                      |                                                   |
| 18:4           | -598.1236                                      |                                                   |
| 18:5           | -598.1129                                      |                                                   |
| 18:6           | -598.1186                                      |                                                   |
| <b>Average</b> | -598.1112                                      |                                                   |
|                | Au <sub>19</sub> <sup>0</sup> Cage Energy (au) | Au <sub>19</sub> <sup>0</sup> Compact Energy (au) |
| 19:1           | -631.3362                                      | -631.3599                                         |
| 19:2           | -631.3418                                      |                                                   |
| 19:3           | -631.3396                                      |                                                   |
| 19:4           | -631.3453                                      |                                                   |
| 19:5           | -631.3468                                      |                                                   |
| 19:6           | -631.3475                                      |                                                   |
| <b>Average</b> | -631.3429                                      |                                                   |
|                | Au <sub>20</sub> <sup>0</sup> Cage Energy (au) | Au <sub>20</sub> <sup>0</sup> Compact Energy (au) |
| 20:1           | -664.5817                                      | -664.6210                                         |
| 20:2           | -664.5810                                      |                                                   |
| 20:3           | -664.5923                                      |                                                   |
| 20:4           | -664.5821                                      |                                                   |

|                |                  |
|----------------|------------------|
| 20:5           | -664.5810        |
| 20:6           | -664.5896        |
| <b>Average</b> | <b>-664.5846</b> |

Table S2: Spherical Aromaticity Parameters for Au<sub>18</sub>, Au<sub>19</sub>, and Au<sub>20</sub> Neutral Cage Isomers.

| Isomer | Symmetry               | NICS (ppm)    | HL Gap (eV) |
|--------|------------------------|---------------|-------------|
| 18:1   | <i>C</i> <sub>2</sub>  | -51.66        | 1.19        |
| 18:2   | <i>D</i> <sub>2</sub>  | -52.02        | 1.02        |
| 18:3   | <i>D</i> <sub>3d</sub> | -54.70        | 0.87        |
| 18:4   | <i>C</i> <sub>2</sub>  | -51.15        | 1.33        |
| 18:5   | <i>D</i> <sub>3h</sub> | -47.33        | 1.10        |
| 18:6   | <i>D</i> <sub>3</sub>  | -56.31        | 1.26        |
|        | <b>Average</b>         | <b>-52.20</b> | <b>1.13</b> |
| 19:1   | <i>C</i> <sub>2</sub>  | +1.15         | 0.79        |
| 19:2   | <i>C</i> <sub>s</sub>  | +11.71        | 1.25        |
| 19:3   | <i>C</i> <sub>s</sub>  | +64.95        | 0.88        |
| 19:4   | <i>C</i> <sub>2</sub>  | -5.65         | 1.24        |
| 19:5   | <i>C</i> <sub>2</sub>  | -8.18         | 1.12        |
| 19:6   | <i>C</i> <sub>3v</sub> | +13.57        | 1.00        |
|        | <b>Average</b>         | <b>+12.93</b> | <b>1.05</b> |
| 20:1   | <i>C</i> <sub>2</sub>  | -15.84        | 0.70        |
| 20:2   | <i>D</i> <sub>2</sub>  | +36.04        | 0.70        |
| 20:3   | <i>C</i> <sub>1</sub>  | -15.82        | 0.70        |
| 20:4   | <i>C</i> <sub>s</sub>  | -16.53        | 0.75        |
| 20:5   | <i>D</i> <sub>2</sub>  | +35.45        | 0.32        |
| 20:6   | <i>D</i> <sub>2d</sub> | -7.62         | 0.76        |
|        | <b>Average</b>         | <b>+2.61</b>  | <b>0.66</b> |

Table S3: Spherical Aromaticity Parameters for Au<sub>19</sub> and Au<sub>20</sub> Cationic Cage Isomers.

| Isomer              | NICS (ppm)    | HL Gap (eV) |
|---------------------|---------------|-------------|
| 19 <sup>+</sup> :1  | -49.34        | 1.30        |
| 19 <sup>+</sup> :2  | -49.81        | 1.32        |
| 19 <sup>+</sup> :3  | -49.00        | 0.95        |
| 19 <sup>+</sup> :4  | -49.34        | 1.31        |
| 19 <sup>+</sup> :5  | -50.28        | 1.17        |
| 19 <sup>+</sup> :6  | -49.60        | 1.06        |
| <b>Average</b>      | <b>-49.56</b> | <b>1.19</b> |
| 20 <sup>+</sup> :1  | -24.56        | 0.53        |
| 20 <sup>+</sup> :2  | -24.74        | 0.85        |
| 20 <sup>+</sup> :3  | -29.28        | 0.67        |
| 20 <sup>+</sup> :4  | -18.21        | 0.79        |
| 20 <sup>+</sup> :5  | -2.18         | 0.77        |
| 20 <sup>+</sup> :6  | -24.52        | 0.69        |
| <b>Average</b>      | <b>-20.58</b> | <b>0.71</b> |
| 20 <sup>2+</sup> :1 | -41.31        | 1.06        |
| 20 <sup>2+</sup> :2 | -39.49        | 0.92        |
| 20 <sup>2+</sup> :3 | -39.62        | 1.40        |
| 20 <sup>2+</sup> :4 | -40.79        | 1.06        |
| 20 <sup>2+</sup> :5 | -28.52        | 0.81        |

|                     |               |             |
|---------------------|---------------|-------------|
| 20 <sup>2+</sup> :6 | -39.36        | 1.08        |
| <b>Average</b>      | <b>-38.18</b> | <b>1.06</b> |

Table S4: Spherical Aromaticity Parameters for Au<sub>19</sub>X and Au<sub>20</sub>X<sub>2</sub> Cage Isomers.

| Isomer                              | NICS (ppm) | HL Gap (eV) |
|-------------------------------------|------------|-------------|
| Au <sub>19</sub> F:1                | -44.43     | 1.22        |
| Au <sub>19</sub> F:2                | -40.26     | 1.07        |
| Au <sub>19</sub> F:3                | -44.61     | 0.99        |
| Au <sub>19</sub> F:4                | -45.64     | 1.05        |
| Au <sub>19</sub> F:5                | -42.30     | 1.11        |
| Au <sub>19</sub> F:6                | -43.42     | 1.13        |
| Au <sub>19</sub> Cl:1               | -42.81     | 1.12        |
| Au <sub>19</sub> Cl:2               | -36.70     | 0.89        |
| Au <sub>19</sub> Cl:3               | -41.71     | 0.97        |
| Au <sub>19</sub> Cl:4               | -45.18     | 1.05        |
| Au <sub>19</sub> Cl:5               | -43.68     | 0.93        |
| Au <sub>19</sub> Cl:6               | -38.66     | 0.99        |
| Au <sub>19</sub> Br:1               | -41.65     | 1.09        |
| Au <sub>19</sub> Br:2               | -35.16     | 1.03        |
| Au <sub>19</sub> Br:3               | -40.90     | 0.96        |
| Au <sub>19</sub> Br:4               | -41.21     | 0.97        |
| Au <sub>19</sub> Br:5               | -43.20     | 0.92        |
| Au <sub>19</sub> Br:6               | -37.95     | 0.97        |
| Au <sub>19</sub> I:1                | -39.54     | 1.04        |
| Au <sub>19</sub> I:2                | -32.13     | 0.96        |
| Au <sub>19</sub> I:3                | -39.13     | 0.96        |
| Au <sub>19</sub> I:4                | -40.24     | 0.92        |
| Au <sub>19</sub> I:5                | -42.34     | 0.87        |
| Au <sub>19</sub> I:6                | -36.56     | 0.94        |
| Au <sub>20</sub> F <sub>2</sub> :1  | -31.78     | 1.16        |
| Au <sub>20</sub> F <sub>2</sub> :2  | -34.09     | 0.95        |
| Au <sub>20</sub> F <sub>2</sub> :3  | -30.56     | 1.22        |
| Au <sub>20</sub> F <sub>2</sub> :4  | -34.24     | 1.02        |
| Au <sub>20</sub> F <sub>2</sub> :5  | -31.58     | 0.76        |
| Au <sub>20</sub> F <sub>2</sub> :6  | -28.67     | 0.70        |
| Au <sub>20</sub> Cl <sub>2</sub> :1 | -31.16     | 1.13        |
| Au <sub>20</sub> Cl <sub>2</sub> :2 | -30.82     | 0.87        |
| Au <sub>20</sub> Cl <sub>2</sub> :3 | -22.99     | 0.95        |
| Au <sub>20</sub> Cl <sub>2</sub> :4 | -19.57     | 0.94        |
| Au <sub>20</sub> Cl <sub>2</sub> :5 | -30.86     | 0.87        |
| Au <sub>20</sub> Cl <sub>2</sub> :6 | -23.75     | 0.94        |
| Au <sub>20</sub> Br <sub>2</sub> :1 | -31.06     | 1.08        |
| Au <sub>20</sub> Br <sub>2</sub> :2 | -31.00     | 0.86        |
| Au <sub>20</sub> Br <sub>2</sub> :3 | -25.45     | 0.95        |
| Au <sub>20</sub> Br <sub>2</sub> :4 | -18.93     | 0.93        |
| Au <sub>20</sub> Br <sub>2</sub> :5 | -28.95     | 0.83        |
| Au <sub>20</sub> Br <sub>2</sub> :6 | -23.19     | 0.92        |
| Au <sub>20</sub> I <sub>2</sub> :1  | -33.31     | 0.67        |
| Au <sub>20</sub> I <sub>2</sub> :2  | -30.15     | 0.87        |

|                              |        |      |
|------------------------------|--------|------|
| $\text{Au}_{20}\text{I}_2:3$ | -21.66 | 0.98 |
| $\text{Au}_{20}\text{I}_2:4$ | -17.53 | 0.90 |
| $\text{Au}_{20}\text{I}_2:5$ | -30.14 | 0.87 |
| $\text{Au}_{20}\text{I}_2:6$ | -21.94 | 0.89 |

Figure S2: Optimized Structures of Isomer 1:  $\text{Au}_{19}\text{X}$  and  $\text{Au}_{20}\text{X}_2$  Cage Clusters.

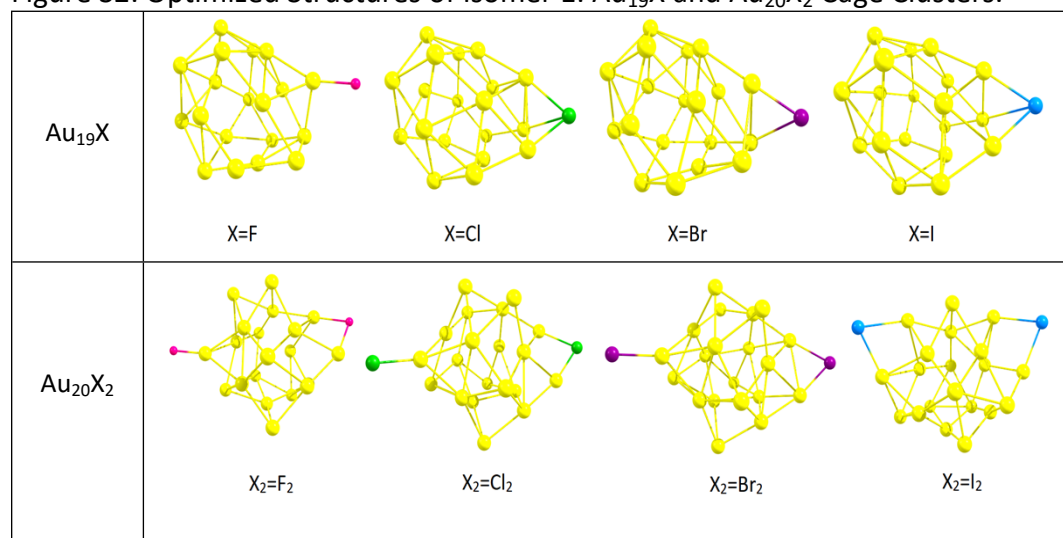

Table S5: Average Spherical Aromaticity Parameters for  $\text{Au}_{19}\text{X}$  and  $\text{Au}_{20}\text{X}_2$ .

|                             | NICS (ppm) | HL Gap (eV) |
|-----------------------------|------------|-------------|
| $\text{Au}_{19}\text{F}$    | -43.44     | 1.10        |
| $\text{Au}_{19}\text{Cl}$   | -41.46     | 0.99        |
| $\text{Au}_{19}\text{Br}$   | -40.01     | 0.99        |
| $\text{Au}_{19}\text{I}$    | -38.33     | 0.95        |
| $\text{Au}_{20}\text{F}_2$  | -31.82     | 0.97        |
| $\text{Au}_{20}\text{Cl}_2$ | -26.53     | 0.95        |
| $\text{Au}_{20}\text{Br}_2$ | -26.43     | 0.94        |
| $\text{Au}_{20}\text{I}_2$  | -25.79     | 0.86        |
